# Supplementary material
Source: PubMed Central journal article supplement (PMC8176400)
Supplement: NIHMS1704199-supplement-Supplementary_Materials.pdf [file NIHMS1704199-supplement-Supplementary_Materials.pdf]

## Supplementary Materials for

### Neuronal delivery of antibodies has therapeutic effects in animal models of botulism

Patrick M. McNutt, Edwin J. Vazquez-Cintron, Luis Tenezaca, Celinia A. Ondeck, Kyle E. Kelly, Mark Mangkhalakhili, James B. Machamer, Christopher A. Angeles, Elliot J. Glotfelty, Jaclyn Cika, Cesar H. Benjumea, Justin T. Whitfield, Philip A. Band, Charles B. Shoemaker, Konstantin Ichtchenko\*

\*Corresponding author. Email: [konstantin.ichtchenko@nyulangone.org](mailto:konstantin.ichtchenko@nyulangone.org)

Published 6 January 2021, *Sci. Transl. Med.* **13**, eabd7789 (2021)

DOI: 10.1126/scitranslmed.abd7789

#### The PDF file includes:

##### Materials and Methods

Fig. S1. sdAb B8 binds LC/A1 but not the intact BoNT/A1 heterodimer.

Fig. S2. B8C1ad expression, purification, and processing.

Fig. S3. Proteomic and immunological characterization of B8C1ad heterodimer.

Fig. S4. Internalized B8LC colocalizes with presynaptic markers in primary neurons.

Fig. S5. Internalized B8LC does not colocalize with endosomal, lysosomal, or autophagosomal markers in primary neurons.

Fig. S6. B8C1ad protects against BoNT/A1 challenge in primary neurons.

Table S1. Dose-dependent toxicities of B8C1ad in mice, guinea pigs, and rhesus macaques.

Table S2. Emergence of respiratory signs of botulism in mice challenged with 2 mipLD<sub>50</sub> BoNT/A1.

Table S3. Sample sizes, statistical analyses, and significance thresholds for all comparisons.

Legends for data files S1 and S2

Reference (52)

#### Other Supplementary Material for this manuscript includes the following:

(available at [stm.sciencemag.org/cgi/content/full/13/575/eabd7789/DC1](http://stm.sciencemag.org/cgi/content/full/13/575/eabd7789/DC1))

Data file S1 (Microsoft Word format). Individual-level details for each experiment.

Data file S2 (Microsoft Excel format). Individual CSS scores at all time points for guinea pig and rhesus macaque survival studies.

## Supplementary Material

### Materials and Methods

**Characterization of sdAb B8 binding to LC/A1 and ciBoNT/A1:** ELISA was used to compare the selectivity of sdAb B8 for isolated LC/A1 *vs* the heterodimer. sdAbs were tested for binding to LC/A1 or a catalytically inactive BoNT/A1 mutant (*ci*BoNT/A1; used as a substitute for active toxin to minimize risk to laboratory personnel, (52) in a 1:5 dilution series ELISA using *Nunc Maxisorb* plates coated overnight at 4°C with 100 µL of 1 µg/mL protein (LC/A1 or *ci*BoNT/A1) (52). ELISA plates were blocked with 4% skim milk in DPBS/0.1% Tween-20. sdAbs were diluted to 0.004, 0.02, 0.11, 0.53, 2.6, 13, 66, and 330 nM in the blocking agent, added to wells, incubated 1 h at room temperature, washed with DPBS/0.1% Tween-20, and incubated with HRP-anti-E-tag mAb. sdAb binding was detected using chromogenic HRP substrate 3,3',5,5'-tetramethylbenzidine (sdAbs B8 and JDQ-H7 were expressed with E-tags at the C-terminus).

**Expression and processing of B8C1ad:** The gene for B8C1ad was engineered with tRNA bias typical for the *Sf9* cell translational machinery and synthesized *de novo*. The full-length B8C1ad DNA was incorporated into recombinant baculovirus as previously described (17), and the protein was expressed as a secreted proprotein, in accordance with CDC regulations. Protein was expressed and purified using the same baculovirus methodology described for BoNT/C1ad (17).

***Proteomic characterization of B8C1ad heterodimer:*** Mass-spectrometry characterization of processed B8C1ad heterodimer was performed at Proteomics laboratory, part of core facilities at NYU Grossman School of Medicine, as previously described (17).

***Western blot characterization of B8C1ad heterodimer:*** B8C1ad protein was loaded on SDS PAGE gels under non-reducing or reducing conditions ( $\beta$ -mercaptoethanol) and separated by SDS PAGE on a 4-12% Criterion gel (*Bio-Rad*), followed by transfer to 0.2  $\mu$ m nitrocellulose membranes. Membranes were blocked and incubated with primary antibodies recognizing OLLAS tag; *c-myc* tag; E-tag; BoNT/C1 light chain; BoNT/C1 heavy chain; or HA tag, followed by incubation with HRP-conjugated secondary antibodies. SuperSignal West Pico chemiluminescent substrate was used for visualization. Western blot images were acquired using LiCor Odyssey Fc imaging system.

***Immunocytochemistry, biochemical properties of B8C1ad, and pattern of protein internalization into primary neuronal cultures:*** E18 rat cortical tissue (BrainBits LLC, Springfield, IL) was dissociated and plated at a density of 78,000 cells/cm<sup>2</sup> on poly-D-lysine coated glass coverslips as previously described (47). Neuronal cultures were maintained at 5% CO<sub>2</sub>, 37°C, and 95% humidity in NbActiv4 medium. Experiments were performed no earlier than 14 days after cell plating to allow for emergence of synaptic activity. B8C1ad was diluted from 10 mg/mL stock in NbActiv4 50% fresh / 50% conditioned medium to a final concentration of 20 nM. Neuronal cultures were exposed to B8C1ad for 24 h, washed 2 times with 37°C CO<sub>2</sub>-equilibrated fresh NbActiv4 medium, and chased with 25% fresh / 75% conditioned medium for another 24 h to complete the process of compound internalization. Specimens were briefly

washed with room temperature DPBS, fixed with ice-cold 4% formaldehyde for 15 minutes at room temperature, permeabilized, and blocked with 3% IgG-free BSA and 0.1% saponin in DPBS for 45 minutes (54). Fixed, permeabilized, and blocked specimens were probed with mouse anti-**STX1** mAb (dilution 1:1,000/Alexa 555 donkey anti-mouse IgG); mouse anti-**SNAP-25** mAb (dilution 1:1,000/Alexa 555 donkey anti-mouse IgG); for synaptic markers, and with human anti-LC/C1 mAb (4C10.2, Dr. J. Marks, UCSF, dilution 1:1,500) for B8C1ad in DPBS overnight at 4°C, followed by incubation for 1 h at room temperature with Alexa 555-labeled secondary antibodies (dilution 1:3,000) for synaptic markers, and with secondary Alexa 488-labeled donkey anti-human IgG (dilution 1:3,000) for B8C1ad. Coverslips were mounted onto slides with Prolong Gold DAPI mounting medium, and images were collected by confocal microscopy Z-stack – for B8LC and synaptic markers by epifluorescence – for DAPI nuclear staining, with standard excitation and emission filters using a Zeiss LSM 710 microscope (*Carl Zeiss Inc*). Images were processed using ImageJ software.

***B8LC co-localization with Endosomal/Lysosomal/Autophagosomal (ELA) markers in neurons:*** E18 rat cortical tissue (BrainBits, LLC) was dissociated and plated at 78,000 cells/cm<sup>2</sup> on glass coverslips and maintained in Neurobasal medium with NeuroCult SM1 Supplement. At 14 d after plating, neurons were exposed to vehicle (50% conditioned Neurobasal medium/SM1) or 50 nM B8C1ad. After 24 h, medium was aspirated, cells were washed with DPBS and chased with 50% conditioned Neurobasal medium/SM1 for 24 h. Cells were washed, fixed with 4% formaldehyde, permeabilized with 0.1% Triton X-100 in DPBS, and blocked with 10% goat serum in DPBS for 45 min at room temperature. Cells were probed with antibodies against mouse anti-Early Endosome Antigen 1 (EEA1) and Alexa 555 donkey anti-mouse IgG1; rabbit

anti-Lysosomal Associated Membrane Protein-1 (LAMP-1) and Alexa 555 donkey anti-rabbit IgG1; or mouse anti-Rab-7 and with Alexa 555 donkey anti-mouse IgG1. Cells were also probed with anti-LC/C1 human mAb 4C10.2 (Dr. J. Marks, UCSF) and Alexa 555 donkey anti-human or Alexa 488 donkey anti-human IgG. Images were collected on a Zeiss LSM 880 confocal microscope and analyzed using Zeiss LSM confocal microscopy software.

***B8C1ad effects on SNAP-25 cleavage after exposure of primary neurons to BoNT/A1:*** E18 rat cortical tissue (BrainBits LLC) was plated at a density of 125,000 cells/cm<sup>2</sup> in polyethylenimine-coated 6-well dishes and maintained at 5% CO<sub>2</sub>, 37°C, and 95% humidity in NbActiv4 medium. At 14 d after plating, neurons were exposed to 5 pM BoNT/A1 for 1.5 h, washed with 50% conditioned medium, chased with fresh medium for 2 h, incubated with 50 nM B8C1ad or saline vehicle for 24 h, washed and incubated for an additional 1, 4, or 7 days. Neurons were lysed on ice with Triton X-100 lysis buffer with protease inhibitors after 1, 4 or 7 d and immunoblots were probed with rabbit anti-E-tag antibody (to detect B8LC), mouse anti-β-actin, and mouse anti-SNAP-25, followed by incubation with HRP-conjugated secondary antibodies. SuperSignal West Pico chemiluminescent substrate was used for visualization. Western blot images were acquired using a LiCor Odyssey Fc imaging system and analyzed by densitometry using instrument software. This experiment was replicated four times with similar results.

**Fig. S1.**

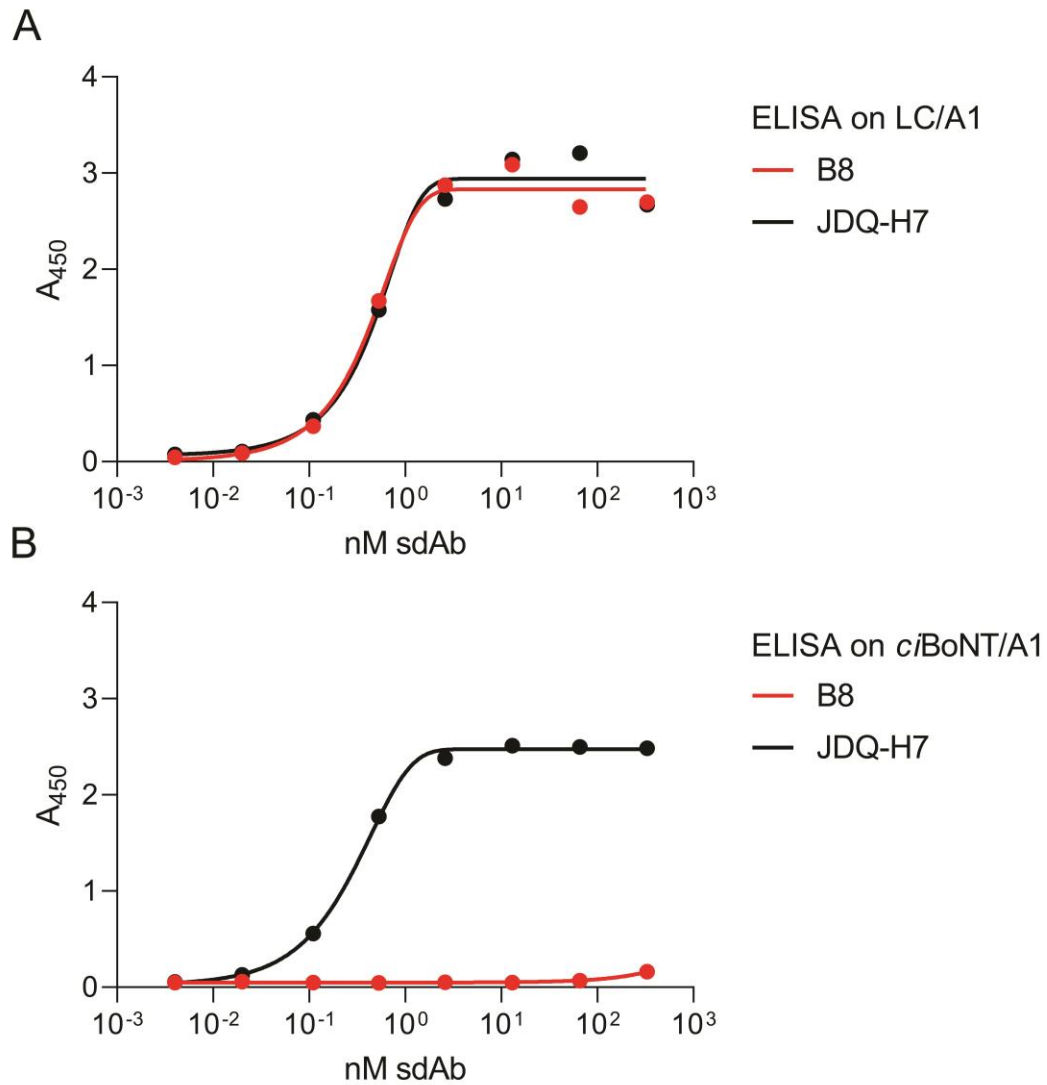

**Fig. S1. sdAb B8 binds LC/A1 but not the intact BoNT/A1 heterodimer.** ELISA assay evaluating binding of sdAbs B8 and positive control JDQ-H7 to (A) purified LC/A1 and (B) catalytically inactive BoNT/A1 holotoxin (*ciBoNT/A1*) (52).

**Fig. S2.**

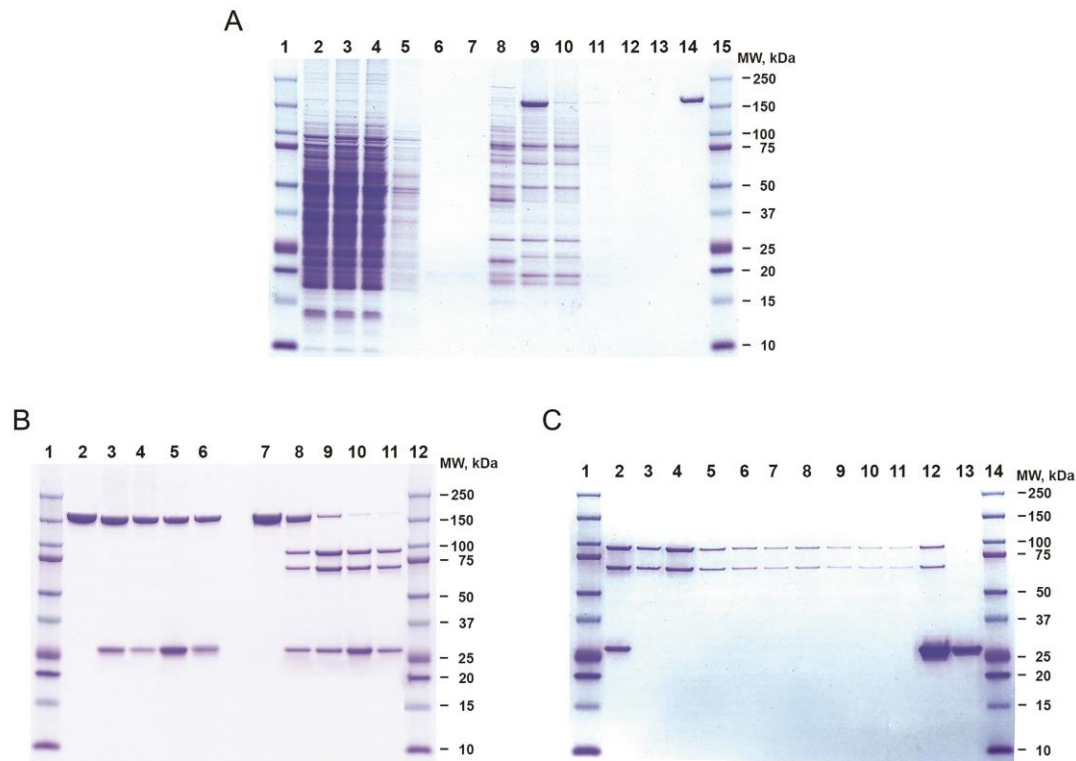

**Fig. S2. B8C1ad expression, purification, and processing.** Coomassie blue-stained, SDS-PAGE gel demonstrating each step of B8C1ad proprotein purification. **(A)** Tandem affinity chromatography to capture protoxin from SF9 cell supernatant: Lanes 1, 15: protein MW ladder; lanes 2–8: products of Ni<sup>2+</sup>-NTA affinity chromatography: lanes 2-3: concentrated and dialyzed culture supernatant containing B8C1ad proprotein; lane 4: flow through; lane 5: wash with 15 mM imidazole buffer; lanes 6-7: washes with 15 mM imidazole buffer; lane 8: wash with 45 mM imidazole buffer; lane 9: eluate obtained with 250 mM imidazole buffer; lanes 10-14: StrepTactin affinity chromatography of eluate from 9; lane 10: flow through; lanes 11-12: 1 M NaCl washes; lane 13: low salt wash; lane 14: eluate obtained with 5 mM D-desthiobiotin. **(B)** Processing of B8C1ad proprotein to heterodimer by proteolytic cleavage with TEV protease: lanes 1, 12: protein MW ladder; lanes 2-6: non-reduced samples; lanes 7-11: samples reduced by incubation with β-mercaptoethanol; lanes 2, 7: no TEV controls; lanes 3, 8: B8C1ad proprotein incubated with TEV for 1 h at 25°C; lanes 4, 9: incubated with TEV for 6 h; lanes 5, 10: incubated with TEV for 24 h; lanes 6, 11: incubated with TEV for 48 h. **(C)** Removal of TEV protease (MW ≈ 27 kDa) from the reaction mixture by Ni<sup>2+</sup>-NTA affinity chromatography: lanes 1, 14: protein MW ladder; lane 2: loading material; lanes 3-4: flow through; lanes 5–8: washes with 15 mM imidazole buffer; lanes 9-11: washes with 45 mM imidazole buffer; lanes 12-13: elution with 250 mM imidazole buffer. Pull-down fractions from lanes 3-11 were pooled for subsequent use.

**Fig. S3.**

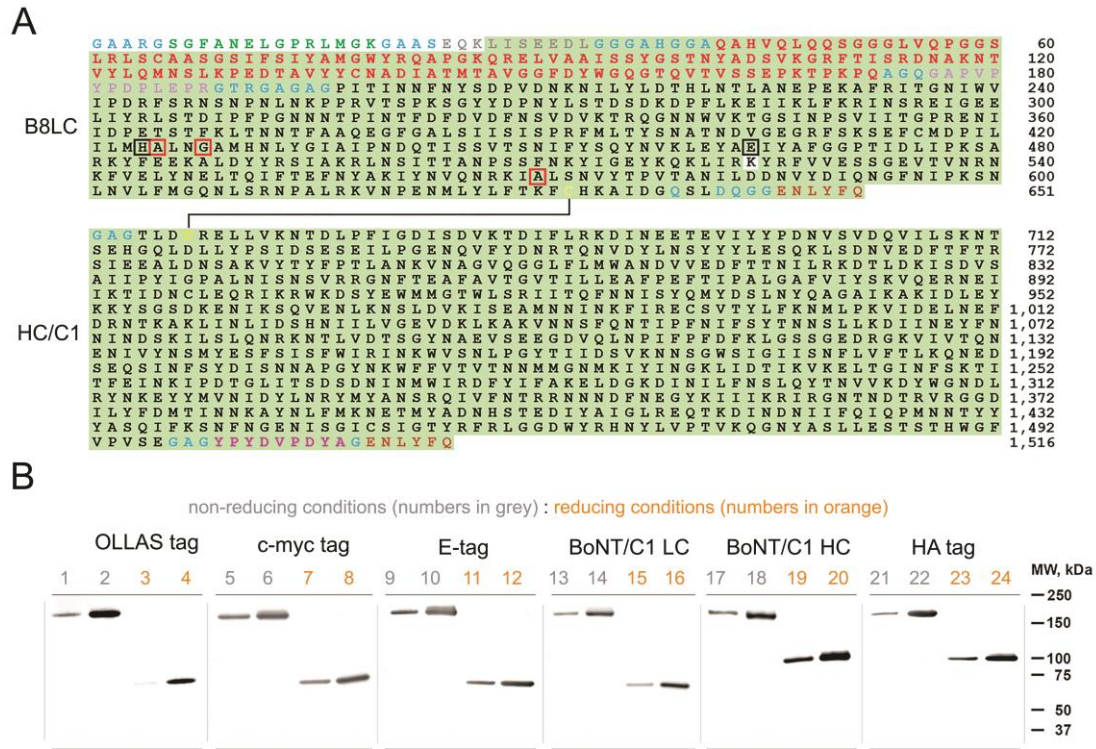

**Fig. S3. Proteomic and immunological characterization of B8C1ad heterodimer.** (A) Sequence of B8LC and HC/C1. Letters on light green background represent confirmed sequences identified among one or more corresponding peptides from tryptic and chymotryptic digests of the recombinant protein. Letters on white background represent known sequences not recovered from any of the digests. Light blue letters represent exogenous linkers/spacers introduced into the recombinant protein. Red letters represent the sequence of sdAb B8. Black letters represent conserved sequences of the C1ad heterodimer. Boxed letters mark positions of five non-adjacent amino acids – H, E, H, E, Y – that form the active site of Zn<sup>2+</sup>-metalloprotease; letters boxed with red outline among this group represent mutations E<sub>425</sub>>A; H<sub>428</sub>>G; Y<sub>570</sub>>A introduced into the metalloprotease active site, rendering it inactive. Light brown letters represent the TEV protease recognition sequence. Yellow letters represent the two cysteine residues that form the disulfide bridge between light and heavy chains of the heterodimer. Green, gray, lavender, and magenta letters represent OLLAS, *c-myc*, E, and HA tags, respectively, introduced for detection purposes at the N-terminus of the construct, at the C-terminus of sdAb B8, or at the C-terminus of the heavy chain. (B) Western blot characterization of B8C1ad heterodimer using primary antibodies recognizing OLLAS, *c-myc*, and E tags, BoNT/C1 light/heavy chains and HA tag, under reducing and non-reducing conditions. Dual lanes shown on each Western blot probe represent 50 ng (odd) and 200 ng (even) B8C1ad loaded.

**Fig S4.**

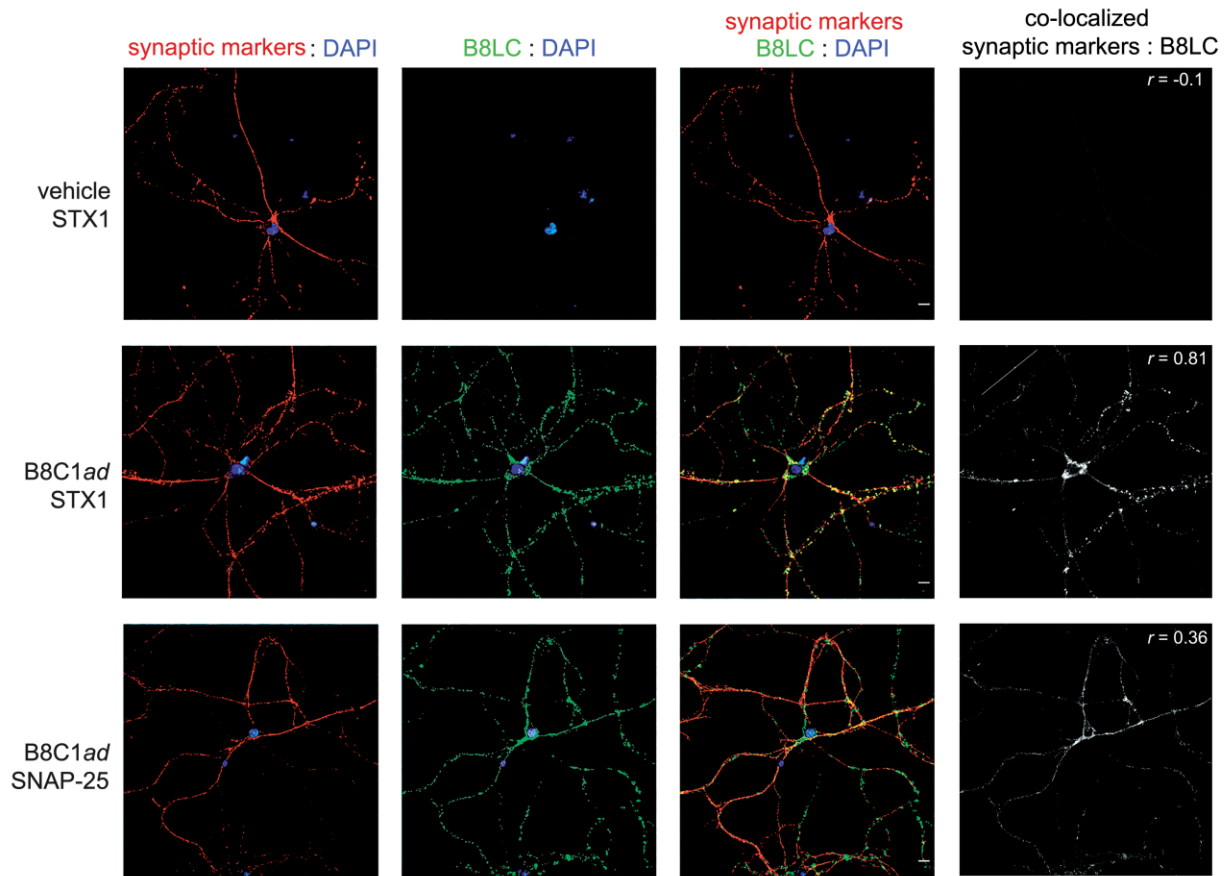

**Fig. S4. Internalized B8LC colocalizes with presynaptic markers in primary neurons.** Rat E18 primary cortical neurons (14 d) were treated for 24 h with vehicle (A) or B8C1ad (B-C) and analyzed for co-localization of B8LC (red) with presynaptic markers (green) by staining for: (A, B) STX1; or (C) SNAP-25. Pearson's above-threshold  $r$  value is presented on each image. Panels on the right identify merged pixels from red and green channels. Scale bar=20  $\mu\text{m}$ .

**Fig. S5.**

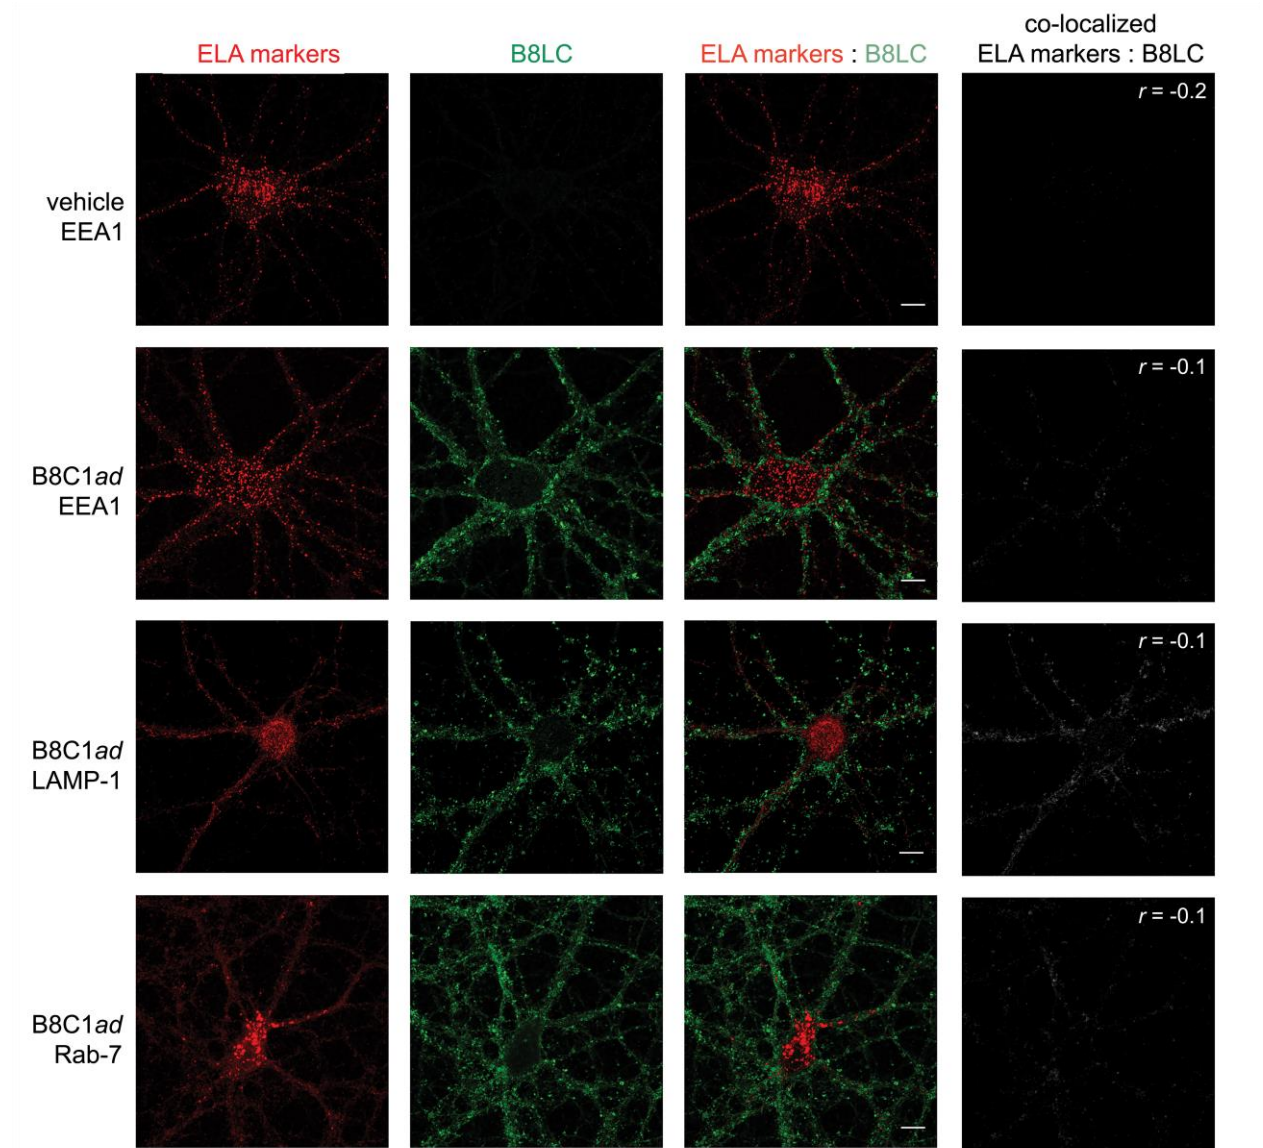

**Fig. S5. Internalized B8LC does not colocalize with endosomal, lysosomal, or autophagosomal markers in primary neurons.** Rat E18 primary cortical neurons (14 d) were treated for 24 h with B8C1ad and analyzed for co-localization of B8LC (green) with endosomal, lysosomal and autophagosomal markers (red): (A) EEA1, (B) LAMP-1 or (C) Rab-7. Pearson's above-threshold R value is presented in white letters on each image. Panels on the right identify merged pixels from red and green channels. Details of statistical comparisons are presented in Table S2. Scale bar=10  $\mu$ m.

**Fig. S6.**

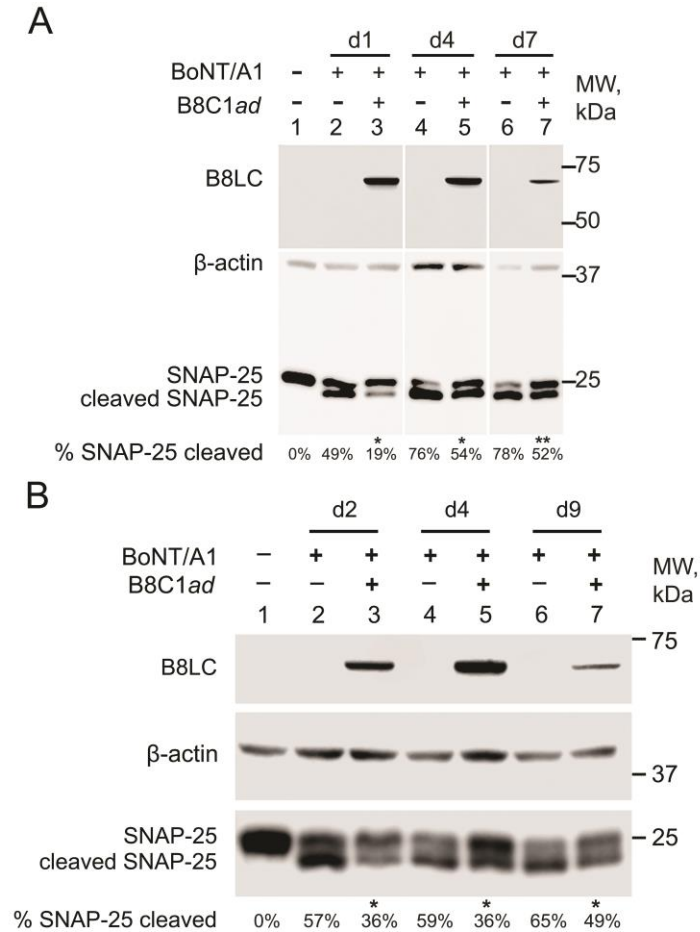

**Fig. S6. B8C1ad protects against BoNT/A1 challenge in primary neurons.** (A) Representative Western blots showing SNAP-25 cleavage in neurons incubated with 5 pM BoNT/A1 for 1.5 h, chased with fresh medium for 2 h, incubated with 50 nM B8C1ad or vehicle for 24 h and lysed after 1, 4, or 7 d. Treatment conditions are marked above each lane and the average percentage of cleaved SNAP-25 is shown below each lane. Bolded percentages indicate significant reduction in SNAP-25 cleavage *vs* vehicle (N=5, n=3-5 for each condition, unpaired Welch's t-test). Lane 1 is naïve neurons harvested at 1 d. (B) Representative Western blot of primary neurons exposed to B8C1ad or vehicle for 24 h, challenged with BoNT/A1 after 1, 3 or 8 d, and harvested 24 h later. β-actin is used as a loading control in panels A and B. The average percentage of cleaved SNAP-25 is shown below each lane (N=3, n=3 for each condition, unpaired Welch's t-test). \**p*<0.05; \*\**p*<0.01. Additional details of statistical comparisons are presented in Table S2.

**Table S1. Dose-dependent toxicities of B8C1ad in mice, guinea pigs, and rhesus macaques.**

| Species (route) and number per dose      | B8C1ad dose (mg/kg) | Max CSS score within cohort: adverse events observed                       |
|------------------------------------------|---------------------|----------------------------------------------------------------------------|
| Mouse (i.p.)<br>n=5-10 per dose          | 0.20                | 0: none observed                                                           |
|                                          | <b>0.40</b>         | <b>0: none observed; identified as NOAEL dose</b>                          |
|                                          | 0.60                | 1: mild paradoxical abdominal breathing; resolved by 48 h                  |
|                                          | 0.80                | 2: mild paradoxical abdominal breathing, lethargy; resolved by 48 h        |
|                                          | 1.00                | 9: severe paradoxical abdominal breathing, limb weakness; resolved by 72 h |
|                                          | 1.20                | 16: 2/5 mice euthanized or found dead at 24 h                              |
|                                          | 1.60                | 16: 3/5 mice euthanized or found dead at 24 h                              |
|                                          | 2.00                | 16: 4/5 mice euthanized or found dead at 24 h                              |
|                                          | 2.40                | 16: 5/5 mice euthanized or found dead at 24 h                              |
| Guinea pig (i.p.)<br>n=3 per dose        | 0.01                | 0: none observed                                                           |
|                                          | 0.02                | 0: none observed                                                           |
|                                          | <b>0.03</b>         | <b>0: none observed; identified as NOAEL dose</b>                          |
|                                          | 0.04                | 3: paradoxical abdominal breathing, lethargy; resolved by 48 h             |
|                                          | 0.08                | 7: forced abdominal breathing, lethargy, lacrimation; resolved by 72 h     |
| Rhesus macaque<br>(i.v.)<br>n=1 per dose | 0.40                | 20: agonal breathing, moribund; euthanized by 48 h                         |
|                                          | 0.02                | 0: none observed                                                           |
|                                          | <b>0.06</b>         | <b>0: none observed; identified as NOAEL dose</b>                          |
|                                          | 0.08                | 1: possible mild abdominal breathing; resolved by 24 h                     |
|                                          | 0.12                | 2: abdominal breathing and muscle weakness; resolved by 60 h               |
|                                          | 0.20                | 16: agonal breathing, prostrate unable to rise; euthanized by 24 h         |
|                                          | 0.40                | 16: agonal breathing, prostrate unable to rise; euthanized by 12 h         |

B8C1ad dose-dependent acute toxicities were determined by monitoring animals for adverse physiological effects after treatment. **(Top row)** Mice were administered 0.2-2.4 mg/kg B8C1ad (i.p.) and physiological status was evaluated at 24 h intervals over 10 d. **(Second row)** Guinea pigs were administered 0.01-0.40 mg/kg B8C1ad (i.p.) and physiological status was evaluated at 24 h intervals over 10 d; **(Bottom row)** Rhesus macaque monkeys were administered 0.02–0.40 mg/kg B8C1ad (i.v.), followed by quarter-dose supplemental administration of B8C1ad (i.v.) at 3 d intervals. Physiological status was assessed at 6 h intervals for up to 10 d.

**Table S2. Emergence of respiratory signs of botulism in mice challenged with 2 mipLD<sub>50</sub> BoNT/A1.**

| <b>Respiratory sign*</b> | <b>Median time of onset (range), h</b> | <b>Incidence</b> |
|--------------------------|----------------------------------------|------------------|
| Mild abdominal paradox   | 8 (6-8)                                | 100% (10/10)     |
| Severe abdominal paradox | 16 (12-16)                             | 100% (10/10)     |
| Agonal breathing         | 20 (18-24)                             | 100% (10/10)     |
| Death                    | 27 (22-34)                             | 100% (10/10)     |

\* Mice were observed for respiratory signs of botulism at 2 h intervals

**Table S3. Sample sizes, statistical analyses, and significance thresholds for all comparisons.**

| Figure #                                                          | group: number of replicates                                                                                                              | Comparison                         | primary test                                     | primary test result (significance at $P < 0.05$ )                                                                                                          | secondary test                                                              | secondary test result (significance at $P < 0.05$ , unless Bonferroni correction is listed in next column)                                                                                    | Bonferroni-corrected significance threshold |
|-------------------------------------------------------------------|------------------------------------------------------------------------------------------------------------------------------------------|------------------------------------|--------------------------------------------------|------------------------------------------------------------------------------------------------------------------------------------------------------------|-----------------------------------------------------------------------------|-----------------------------------------------------------------------------------------------------------------------------------------------------------------------------------------------|---------------------------------------------|
| 1C<br>FRET-based cleavage assay                                   | C1ad: 2 replicates per concentration<br>B8C1ad: 2 replicates per concentration                                                           | FRET ratio (normalized to vehicle) | Welch's t-test with Bonferroni-Dunn's correction | 1:1: B8C1ad (18.8%) vs C1ad (99.9%): $P < 0.0001$<br>9:1: B8C1ad (3.0%) vs C1ad (99.9%): $P < 0.0001$<br>81:1: B8C1ad (2.2%) vs C1ad (99.9%): $P < 0.0001$ |                                                                             |                                                                                                                                                                                               |                                             |
| 2A<br>Co-localization studies in primary neurons                  | wfLC/A1 vs B8LCad, 3 technical replicates                                                                                                | co-localization                    | Pearson's r (above threshold)                    | $r = 0.59$ (PSF = 3.0)                                                                                                                                     |                                                                             |                                                                                                                                                                                               |                                             |
| 2C<br>SNAP-25 cleavage at 1 d in primary neurons                  | vehicle: 5 biological replicates<br>B8C1ad: 5 biological replicates<br>sdAb B8: 3 biological replicates<br>C1ad: 4 biological replicates | percentage of cleaved SNAP-25      | Mixed-effects, one-way ANOVA                     | $F(1.48, 4.45) = 36.58$ , $P = 0.0021$                                                                                                                     | Dunnett's multiple comparisons test                                         | vehicle vs B8C1ad: $P = 0.0006$<br>vehicle vs B8 sdAb: $P = 0.4879$<br>vehicle vs C1ad: $P = 0.3277$                                                                                          |                                             |
| 3A<br>LD <sub>50</sub> determinations in mice                     | BoNT/A: 12 mice per dose, 7 doses                                                                                                        | non-linear regression              | $R^2$<br>95% CI                                  | $R^2 = 0.99$<br>95% CI = 0.15-0.19 ng/kg                                                                                                                   |                                                                             |                                                                                                                                                                                               |                                             |
|                                                                   | B8C1ad: 5 mice per dose, 8 doses                                                                                                         | non-linear regression              | $R^2$<br>95% CI                                  | $R^2 = 0.97$<br>95% CI = 1.18-1.72 mg/kg                                                                                                                   |                                                                             |                                                                                                                                                                                               |                                             |
| 3B<br>Efficacy in mice<br>2 mipLD <sub>50</sub> , i.p.            | vehicle: 15<br>B8 alone: 10<br>C1ad alone: 10<br>B8C1ad: 15                                                                              | median survival time               | Mantel-cox log-rank test                         | $\chi^2(3,50) = 42.3$ , $P < 0.0001$                                                                                                                       | pairwise Mantel-Cox log-rank test with adjusted significance threshold      | vehicle vs B8C1ad: $\chi^2(1,30) = 30.3$ , $P < 0.0001$<br>vehicle vs B8 sdAb: $\chi^2(1,25) = 0.25$ , $P = 0.62$<br>vehicle vs C1ad: $\chi^2(1,25) = 0.25$ , $P = 0.62$                      | $P < 0.0167$                                |
|                                                                   |                                                                                                                                          | survival rate 10 d                 | Chi-square contingency test                      | $\chi^2(3,50) = 45.4$ , $P < 0.0001$                                                                                                                       | pairwise two-sided Fisher's exact test with adjusted significance threshold | vehicle (0/15) vs B8 sdAb (0/10): $P < 0.99$<br>vehicle (0/15) vs C1ad (0/10): $P < 0.99$<br>vehicle (0/15) vs B8C1ad (14/15): $P < 0.0001$                                                   | $P < 0.0167$                                |
| 3C<br>Efficacy in mice<br>4, 6 mipLD <sub>50</sub> , i.p.         | 4 mipLD <sub>50</sub> : vehicle vs B8C1ad: 5 each                                                                                        | median survival time               | Mantel-cox log-rank test                         | $\chi^2(1,10) = 6.0$ , $P = 0.0143$                                                                                                                        |                                                                             |                                                                                                                                                                                               |                                             |
|                                                                   |                                                                                                                                          | survival rate 10 d                 | two-sided Fisher's exact test                    | vehicle (0/5) vs B8C1ad (3/5): $P = 0.17$                                                                                                                  |                                                                             |                                                                                                                                                                                               |                                             |
|                                                                   | 6 mipLD <sub>50</sub> : vehicle vs B8C1ad: 5 each                                                                                        | median survival time               | Mantel-cox log-rank test                         | $\chi^2(1,10) = 6.0$ , $P = 0.014$                                                                                                                         |                                                                             |                                                                                                                                                                                               |                                             |
|                                                                   |                                                                                                                                          | survival rate 10 d                 | two-sided Fisher's exact test                    | vehicle (0/5) vs B8C1ad (1/5): $P > 0.99$                                                                                                                  |                                                                             |                                                                                                                                                                                               |                                             |
| 3D<br>Prophylaxis in mice<br>2 mipLD <sub>50</sub> , i.p.         | -2 d vehicle: 10<br>-2 d B8C1ad: 12<br>-3 d B8C1ad: 10<br>-4 d B8C1ad: 10                                                                | median survival time               | Mantel-cox log-rank test                         | $\chi^2(3,42) = 32.1$ , $P < 0.0001$                                                                                                                       | pairwise Mantel-Cox log-rank test with adjusted significance threshold      | vehicle vs -2 d B8C1ad: $\chi^2(1,22) = 17.69$ , $P < 0.0001$<br>vehicle vs -3 d B8C1ad: $\chi^2(1,20) = 12.91$ , $P = 0.003$<br>vehicle vs -4 d B8C1ad: $\chi^2(1,20) = 12.91$ , $P = 0.003$ | $P < 0.0167$                                |
|                                                                   |                                                                                                                                          | survival rate 10 d                 | Chi-square contingency test                      | $\chi^2(3,42) = 18.6$ , $P = 0.0003$                                                                                                                       | pairwise two-sided Fisher's exact test with adjusted significance threshold | vehicle (0/10) vs -2 d B8C1ad (10/12): $P = 0.0001$<br>vehicle (0/10) vs -3 d B8C1ad (6/10): $P = 0.011$<br>vehicle (0/10) vs -4 d B8C1ad (2/10): $P = 0.47$                                  | $P < 0.0167$                                |
| 4A<br>B8C1ad vs antitoxin in mice<br>2 mipLD <sub>50</sub> , i.p. | 3 h: antitoxin vs B8C1ad: 20 each                                                                                                        | survival rate 10 d                 | two-sided Fisher's exact test                    | antitoxin (14/20) vs B8C1ad (20/20): $P = 0.020$                                                                                                           |                                                                             |                                                                                                                                                                                               |                                             |
|                                                                   | 6 h: antitoxin vs B8C1ad: 20 each                                                                                                        | survival rate 10 d                 | two-sided Fisher's exact test                    | antitoxin (13/20) vs B8C1ad (20/20): $P = 0.008$                                                                                                           |                                                                             |                                                                                                                                                                                               |                                             |
|                                                                   | 8 h: antitoxin vs B8C1ad: 20 each                                                                                                        | survival rate 10 d                 | two-sided Fisher's exact test                    | antitoxin (6/20) vs B8C1ad (20/20): $P < 0.0001$                                                                                                           |                                                                             |                                                                                                                                                                                               |                                             |
|                                                                   | 12 h: antitoxin vs B8C1ad: 30 each                                                                                                       | survival rate 10 d                 | two-sided Fisher's exact test                    | antitoxin (7/20) vs B8C1ad (30/30): $P < 0.0001$                                                                                                           |                                                                             |                                                                                                                                                                                               |                                             |
|                                                                   | 16 h: antitoxin vs B8C1ad: 20 each                                                                                                       | survival rate 10 d                 | two-sided Fisher's exact test                    | antitoxin (0/20) vs B8C1ad (16/20): $P < 0.0001$                                                                                                           |                                                                             |                                                                                                                                                                                               |                                             |
|                                                                   | 20 h: antitoxin vs B8C1ad: 30 each                                                                                                       | survival rate 10 d                 | two-sided Fisher's exact test                    | antitoxin (0/20) vs B8C1ad (17/30): $P < 0.0001$                                                                                                           |                                                                             |                                                                                                                                                                                               |                                             |
| 4B<br>B8C1ad vs antitoxin in mice<br>2 mipLD <sub>50</sub> , i.v. | 12 h: antitoxin vs B8C1ad: 5 each                                                                                                        | survival rate 10 d                 | two-sided Fisher's exact test                    | antitoxin (1/5) vs B8C1ad (5/5): $P = 0.048$                                                                                                               |                                                                             |                                                                                                                                                                                               |                                             |
|                                                                   | 16 h: antitoxin vs B8C1ad: 5 each                                                                                                        | survival rate 10 d                 | two-sided Fisher's exact test                    | antitoxin (0/5) vs B8C1ad (5/5): $P = 0.008$                                                                                                               |                                                                             |                                                                                                                                                                                               |                                             |
|                                                                   | 20 h: antitoxin vs B8C1ad: 5 each                                                                                                        | survival rate 10 d                 | two-sided Fisher's exact test                    | antitoxin (0/5) vs B8C1ad (5/5): $P = 0.008$                                                                                                               |                                                                             |                                                                                                                                                                                               |                                             |

|                                                                                            |                                                                                                                                                            |                       |                                     |                                                                                                                    |                                                                             |                                                                                                                                                                                                                                                                                                                                                                                                                                     |             |
|--------------------------------------------------------------------------------------------|------------------------------------------------------------------------------------------------------------------------------------------------------------|-----------------------|-------------------------------------|--------------------------------------------------------------------------------------------------------------------|-----------------------------------------------------------------------------|-------------------------------------------------------------------------------------------------------------------------------------------------------------------------------------------------------------------------------------------------------------------------------------------------------------------------------------------------------------------------------------------------------------------------------------|-------------|
| 4C, D<br>B8C1ad ED <sub>50</sub> in mice<br>2 mipLD <sub>50</sub> ; i.v.<br>B8C1ad at 10 h | vehicle: 23<br>0.003 mg/kg; 10<br>0.01 mg/kg; 8<br>0.02 mg/kg; 17<br>0.03 mg/kg; 8<br>0.10 mg/kg; 25<br>0.20 mg/kg; 10<br>0.30 mg/kg; 25<br>0.40 mg/kg; 10 | non-linear regression | R <sup>2</sup><br>95% CI            | R <sup>2</sup> = 0.98<br>95% CI = 0.023-0.028 mg/kg                                                                |                                                                             |                                                                                                                                                                                                                                                                                                                                                                                                                                     |             |
|                                                                                            |                                                                                                                                                            | survival rate 10 d    | Chi-square contingency test         | $\chi^2(136,8) = 101.3, P < \mathbf{0.0001}$                                                                       | Dunnett's multiple comparisons test                                         | vehicle (0/23) vs 0.003 (0/10): $P > 0.9999$<br>vehicle (0/23) vs 0.01 (1/8): $P = 0.9445$<br>vehicle (0/23) vs 0.02 (3/17): $P = 0.1458$<br>vehicle (0/23) vs 0.03 (6/8): $P < \mathbf{0.0001}$<br>vehicle (0/23) vs 0.10 (23/25): $P < \mathbf{0.0001}$<br>vehicle (0/23) vs 0.20 (9/10): $P < \mathbf{0.0001}$<br>vehicle (0/23) vs 0.30 (24/25): $P < \mathbf{0.0001}$<br>vehicle (0/23) vs 0.40 (10/10): $P < \mathbf{0.0001}$ |             |
|                                                                                            |                                                                                                                                                            | CSS at 10 d           | Kruskal-Wallis one-way ANOVA        | $H(8) = 96.0, P < \mathbf{0.0001}$                                                                                 | Dunn's multiple comparisons test                                            | vehicle vs 0.003: $P > 0.9999$<br>vehicle vs 0.01: $P > 0.9999$<br>vehicle vs 0.02: $P > 0.9999$<br>vehicle vs 0.03: $P < 0.0757$<br>vehicle vs 0.10: $P < \mathbf{0.0001}$<br>vehicle vs 0.20: $P < \mathbf{0.0001}$<br>vehicle vs 0.30: $P < \mathbf{0.0001}$<br>vehicle vs 0.40: $P < \mathbf{0.0001}$                                                                                                                           |             |
|                                                                                            |                                                                                                                                                            |                       |                                     |                                                                                                                    |                                                                             |                                                                                                                                                                                                                                                                                                                                                                                                                                     |             |
| 5A, B<br>Efficacy in guinea pigs<br>19 mipLD <sub>50</sub> /kg; i.m.                       | vehicle: 14<br>single dose (SD) B8C1ad: 9<br>multi-dose (MD) B8C1ad: 18                                                                                    | median survival time  | Mantel-cox log-rank test            | $\chi^2(2,41) = 35.06, P < \mathbf{0.0001}$                                                                        | pairwise Mantel-Cox log-rank test with adjusted significance threshold      | vehicle vs single-dose B8C1ad: $\chi^2(1,23) = 15.73, P < \mathbf{0.0001}$<br>vehicle vs multiple-dose B8C1ad: $\chi^2(1,32) = 33.59, P < \mathbf{0.0001}$                                                                                                                                                                                                                                                                          | $P < 0.025$ |
|                                                                                            |                                                                                                                                                            | survival rate 10 d    | Chi-square contingency test         | $\chi^2(2,41) = 23.76, P < \mathbf{0.0001}$                                                                        | pairwise two-sided Fisher's exact test with adjusted significance threshold | vehicle (0/14) vs single-dose B8C1ad (1/9): $P = 0.39$<br>vehicle (0/14) vs multiple-dose B8C1ad (14/18): $P < \mathbf{0.0001}$                                                                                                                                                                                                                                                                                                     | $P < 0.025$ |
|                                                                                            |                                                                                                                                                            | CSS comparison        | two-way ANOVA with Dunnett's        | time x treatment: $F(20,380) = 23.51, P < \mathbf{0.0001}$                                                         |                                                                             |                                                                                                                                                                                                                                                                                                                                                                                                                                     |             |
|                                                                                            |                                                                                                                                                            |                       |                                     |                                                                                                                    |                                                                             |                                                                                                                                                                                                                                                                                                                                                                                                                                     |             |
| 6A, B<br>Efficacy in monkeys<br>40 mipLD <sub>50</sub> /kg; i.v.                           | vehicle: 7<br>B8C1ad: 6                                                                                                                                    | median survival time  | Mantel-cox log-rank test            | $\chi^2(1,13) = 12.51, P = \mathbf{0.0004}$                                                                        |                                                                             |                                                                                                                                                                                                                                                                                                                                                                                                                                     |             |
|                                                                                            |                                                                                                                                                            | survival rate 10 d    | two-sided Fisher's exact test       | vehicle (0/7) vs B8C1ad (6/6): $P = \mathbf{0.0006}$                                                               |                                                                             |                                                                                                                                                                                                                                                                                                                                                                                                                                     |             |
|                                                                                            |                                                                                                                                                            | CSS comparison        | two-way ANOVA with Sidak's          | time x treatment: $F(41,451) = 96.93, P < \mathbf{0.0001}$                                                         |                                                                             |                                                                                                                                                                                                                                                                                                                                                                                                                                     |             |
|                                                                                            |                                                                                                                                                            |                       |                                     |                                                                                                                    |                                                                             |                                                                                                                                                                                                                                                                                                                                                                                                                                     |             |
| S4<br>Co-localization with<br>presynaptic markers                                          | STX1 vs vehicle, 3 technical replicates                                                                                                                    | co-localization       | Pearson's R value (above threshold) | $r = -0.1$ (PSF = 3.0)                                                                                             |                                                                             |                                                                                                                                                                                                                                                                                                                                                                                                                                     |             |
|                                                                                            | STX1 vs B8C1ad, 3 technical replicates                                                                                                                     | co-localization       | Pearson's R value (above threshold) | $r = 0.81$ (PSF = 3.0)                                                                                             |                                                                             |                                                                                                                                                                                                                                                                                                                                                                                                                                     |             |
|                                                                                            | SNAP-25 vs B8C1ad, 3 technical replicates                                                                                                                  | co-localization       | Pearson's R value (above threshold) | $r = 0.36$ (PSF = 3.0)                                                                                             |                                                                             |                                                                                                                                                                                                                                                                                                                                                                                                                                     |             |
|                                                                                            |                                                                                                                                                            |                       |                                     |                                                                                                                    |                                                                             |                                                                                                                                                                                                                                                                                                                                                                                                                                     |             |
| S5<br>Co-localization with<br>ELA markers                                                  | EEA1 vs vehicle, 3 technical replicates                                                                                                                    | co-localization       | Pearson's R value (above threshold) | $r = -0.2$ (PSF = 3.0)                                                                                             |                                                                             |                                                                                                                                                                                                                                                                                                                                                                                                                                     |             |
|                                                                                            | EEA1 vs B8C1ad, 3 technical replicates                                                                                                                     | co-localization       | Pearson's R value (above threshold) | $r = -0.1$ (PSF = 3.0)                                                                                             |                                                                             |                                                                                                                                                                                                                                                                                                                                                                                                                                     |             |
|                                                                                            | LAMP-1 vs B8C1ad, 3 technical replicates                                                                                                                   | co-localization       | Pearson's R value (above threshold) | $r = -0.1$ (PSF = 3.0)                                                                                             |                                                                             |                                                                                                                                                                                                                                                                                                                                                                                                                                     |             |
|                                                                                            | Rab-7 vs B8C1ad, 3 technical replicates                                                                                                                    | co-localization       | Pearson's R value (above threshold) | $r = -0.1$ (PSF = 3.0)                                                                                             |                                                                             |                                                                                                                                                                                                                                                                                                                                                                                                                                     |             |
|                                                                                            |                                                                                                                                                            |                       |                                     |                                                                                                                    |                                                                             |                                                                                                                                                                                                                                                                                                                                                                                                                                     |             |
| S6A<br>SNAP-25 cleavage<br>after<br>1, 4 and 7 d of<br>treatment                           | vehicle: 3 biological replicates/time point<br>B8C1ad: 3 biological replicates/time point                                                                  | SNAP-25 cleavage      | unpaired Welch's t-test             | 1 d: $t = 3.8, P = \mathbf{0.0191}$<br>4 d: $t = 8.2, P = \mathbf{0.0144}$<br>7 d: $t = 12.2, P = \mathbf{0.0066}$ |                                                                             |                                                                                                                                                                                                                                                                                                                                                                                                                                     |             |
| S6B<br>SNAP-25 cleavage at<br>2, 4 and 9 d latencies                                       | vehicle: 3 biological replicates/time point<br>B8C1ad: 3 biological replicates/time point                                                                  | SNAP-25 cleavage      | unpaired Welch's t-test             | 2 d: $t = 4.2, P = \mathbf{0.0133}$<br>4 d: $t = 3.8, P = \mathbf{0.0195}$<br>9 d: $t = 3.3, P = \mathbf{0.0327}$  |                                                                             |                                                                                                                                                                                                                                                                                                                                                                                                                                     |             |

Summary of all experimental conditions, number of biological replicates per condition, the type of statistical analysis, statistical outcomes and significance thresholds for all comparisons.

**Data file S1. Individual-level details for each experiment.**

Provided as a separate Word file.

**Data file S2. Individual CSS scores at all time points for guinea pig and rhesus macaque survival studies.**

Provided as a separate Excel file.
